# Supplementary material for: Zn-alloyed MAPbBr3 crystals with improved thermoelectric and photocatalytic properties
Source: Royal Society of Chemistry journal article supplement (doi:10.1039/d1qm00993a), 2021-01-01
Supplement: d1qm00993a1.pdf [file d1qm00993a1.pdf]

## Supporting Information

### Zn alloyed MAPbBr<sub>3</sub> crystals for improved thermoelectrics and photocatalyst

Zhanwei Zhou<sup>a</sup>, Jiuyuan Xu<sup>a</sup>, Yuxuan Liu<sup>b</sup>, Wei Chen<sup>a</sup>, Hengyang Zhang<sup>c</sup>, Qun Wang<sup>c\*</sup>

<sup>a</sup>Beijing Satellite Manufacturing Co., Ltd, <sup>b</sup>Aerospace Dong fang hong Satellite Co.,Ltd, Beijing 100194 China, <sup>c</sup>School of Chemistry and Chemical Engineering, Harbin Institute of Technology, Harbin, 150001, China

E-mail: [wangqun5992@hit.edu.cn](mailto:wangqun5992@hit.edu.cn);

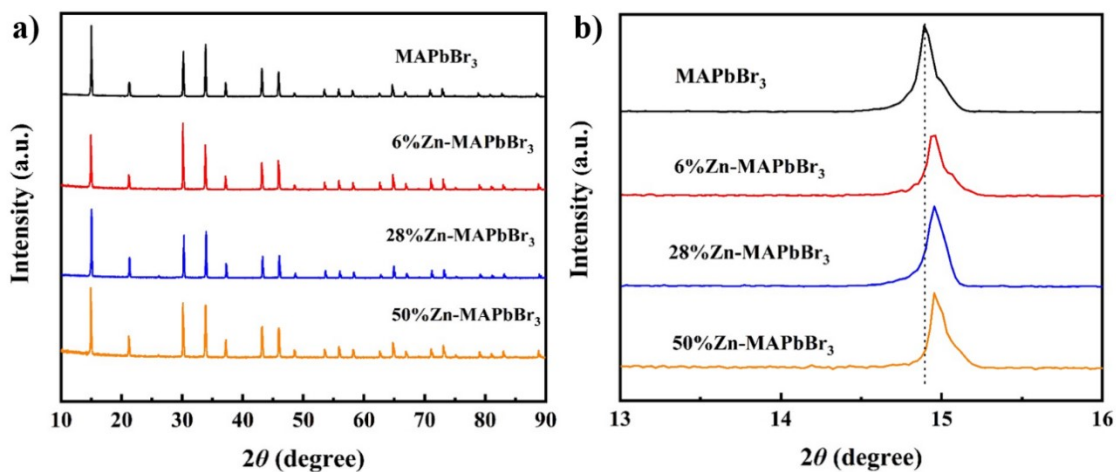

**Fig. S1** a) XRD patterns and b) zoomed-in XRD peaks of different Zn:Pb molar ratios of the precursors.

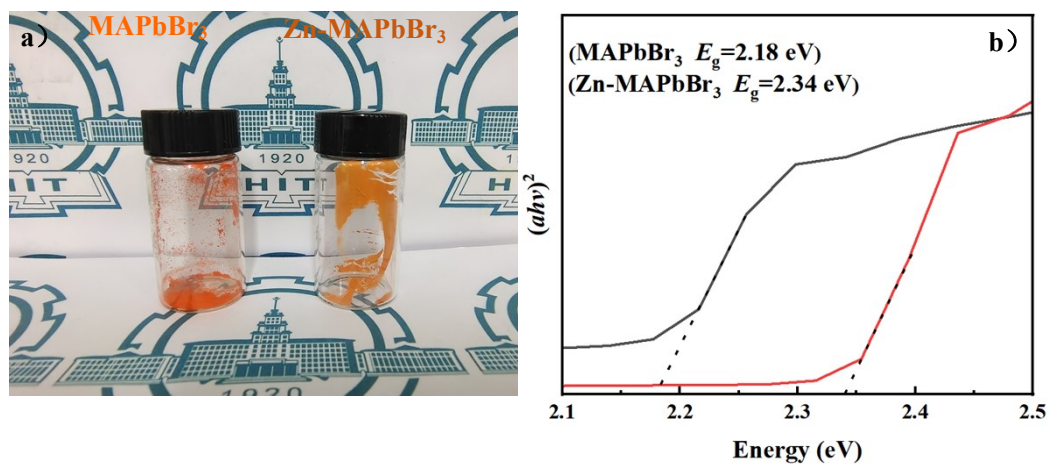

**Fig. S2** Digital photographs of the orange-red color MAPbBr<sub>3</sub> and orange Zn-MAPbBr<sub>3</sub> powder samples and their band gap values from Tauc plots.

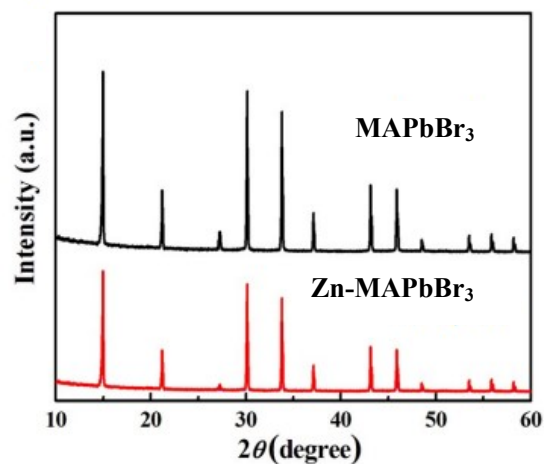

**Fig. S3** XRD patterns of MAPbBr<sub>3</sub> and Zn-MAPbBr<sub>3</sub> after 3 weeks indicating no appreciable change in the crystal structure.

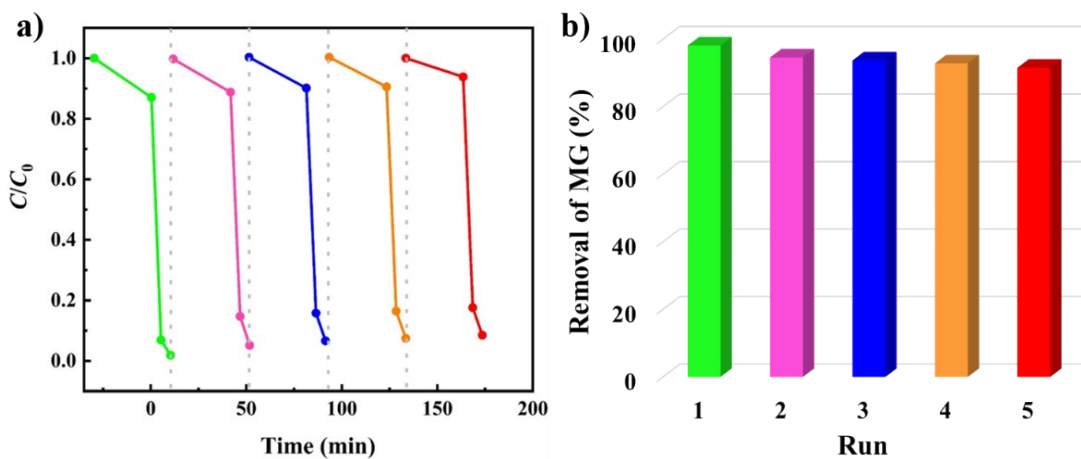

**Fig. S4** (a, b) Schematic photocatalytic reaction cycle stability after the 1<sup>st</sup> and 5<sup>th</sup> reaction cycle and the removal of MG still remain ~92%.

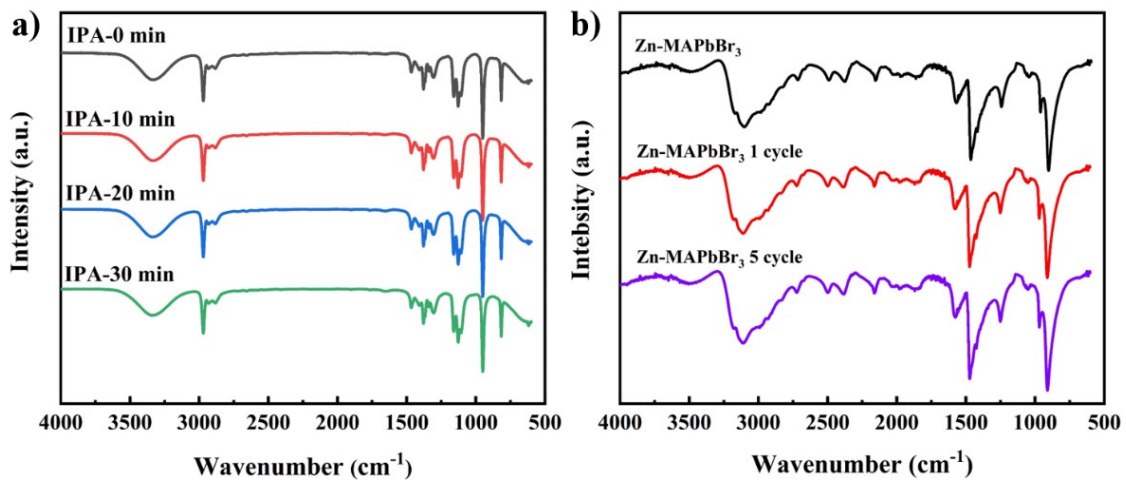

**Fig. S5** (a, b) FTIR spectra of IPA solvent and Zn-MAPbBr<sub>3</sub> sample for different time, showing no evident change for solvent and catalyst.
